# Supplementary material for: Ce and Nd stable isotope purification and determination of geological samples by MC-ICP-MS
Source: Royal Society of Chemistry journal article supplement (doi:10.1039/d2ja00082b), 2022-01-01
Supplement: d2ja00082b1.pdf [file d2ja00082b1.pdf]

Table S1 ICP-MS operating conditions and measurement parameters

---

|                              |                          |
|------------------------------|--------------------------|
| RF power                     | 1.55kW                   |
| Plasma Ar flow               | 14 L min <sup>-1</sup>   |
| Auxiliary gas flow rate      | 0.8 L min <sup>-1</sup>  |
| Nebulizer gas flow rate      | 1.02 L min <sup>-1</sup> |
| Torch                        | Quartz                   |
| Temperature of spray chamber | 2°C                      |
| Sample uptake                | 1mL min <sup>-1</sup>    |
| Cones                        | Ni                       |
| Spray chamber                | Quartz cyclonic          |
| measurement time             | 0.2 seconds              |
| Wash time                    | 60 seconds               |
| Number of analyses           | 3                        |

---
